# Supplementary material for: Synthesis and Antimicrobial Activity of New Mannich Bases with Piperazine Moiety
Source: MDPI journal article supplement (doi:10.3390/molecules28145562), 2023-07-21
Supplement: s1 [file s1]

## Supplementary Information

### Synthesis and antimicrobial activity of new Mannich bases with piperazine moiety

Sara Janowska<sup>1\*</sup>, Sylwia Andrzejczuk<sup>2</sup>, Piotr Gawryś<sup>3</sup> and Monika Wujec<sup>1\*</sup>

<sup>1</sup>Department of Organic Chemistry, Faculty of Pharmacy, Medical University of Lublin, 4a Chodzki Street, 20-093 Lublin, Poland

<sup>2</sup>Department of Pharmaceutical Microbiology, Faculty of Pharmacy, Medical University of Lublin, 1 Chodzki Street, 20-093 Lublin, Poland

<sup>3</sup>Students Research Group at the Department of Organic Chemistry

\*corresponding authors: monika.wujec@umlub.pl, sara.janowska@umlub.pl

#### Table of contents:

|                                      |   |
|--------------------------------------|---|
| 1. <sup>1</sup> H NMR spectra .....  | 2 |
| 2. <sup>13</sup> C NMR spectra ..... | 6 |

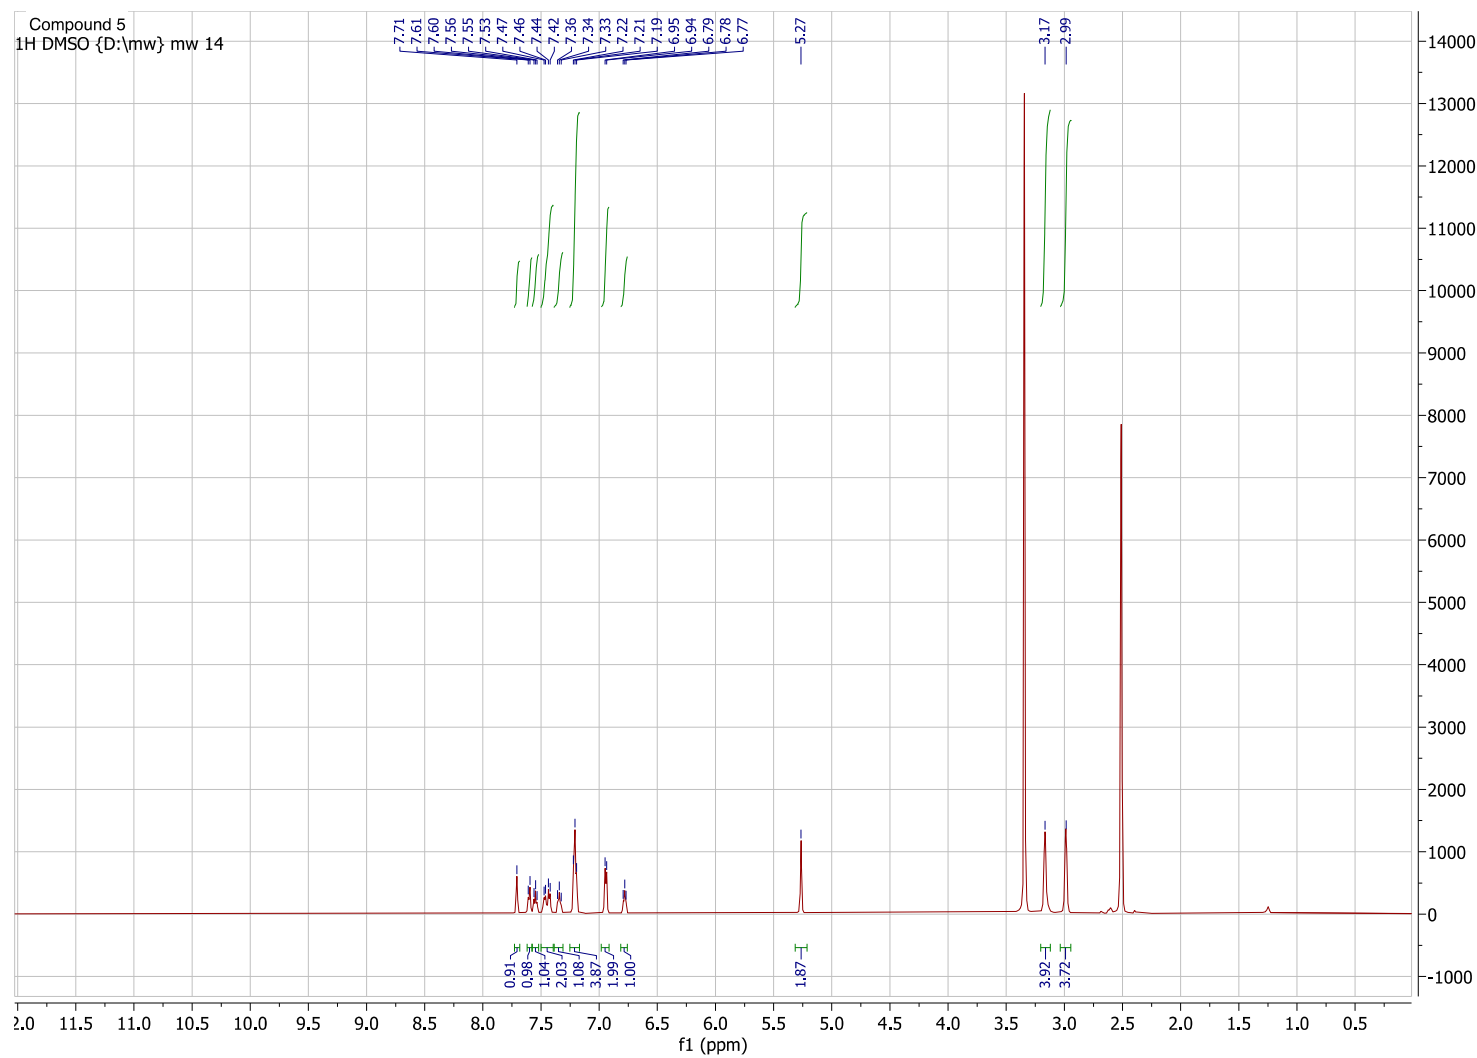

Figure S1. The  $^1\text{H}$  NMR of compound 5.

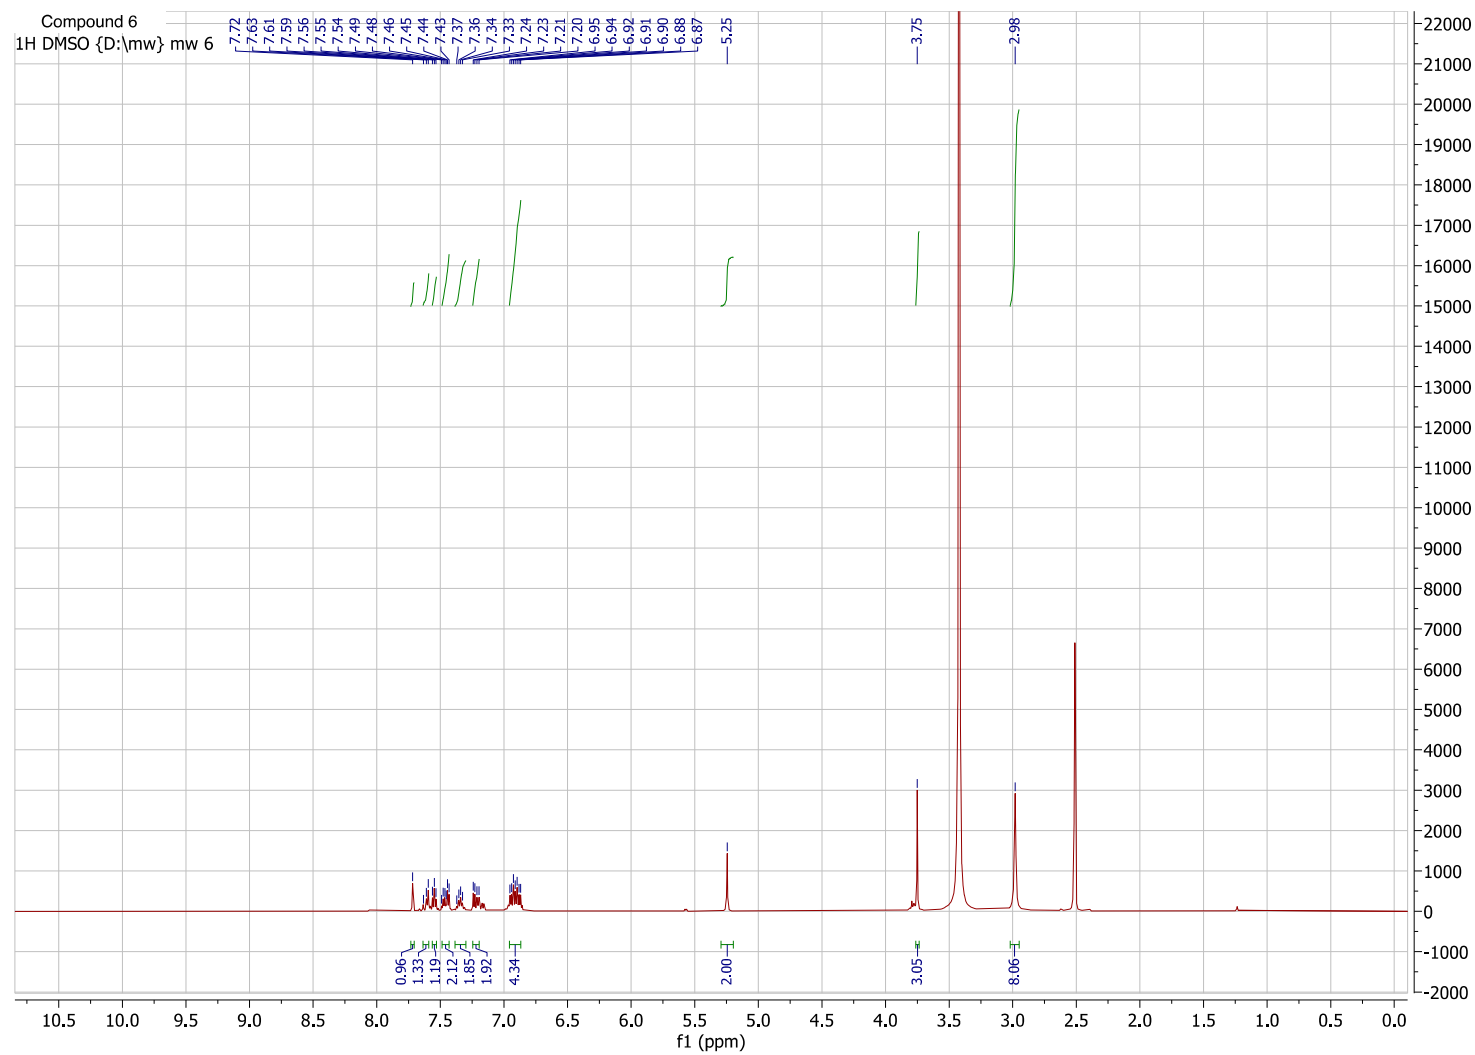

Figure S2. The  $^1\text{H}$  NMR of compound 6.

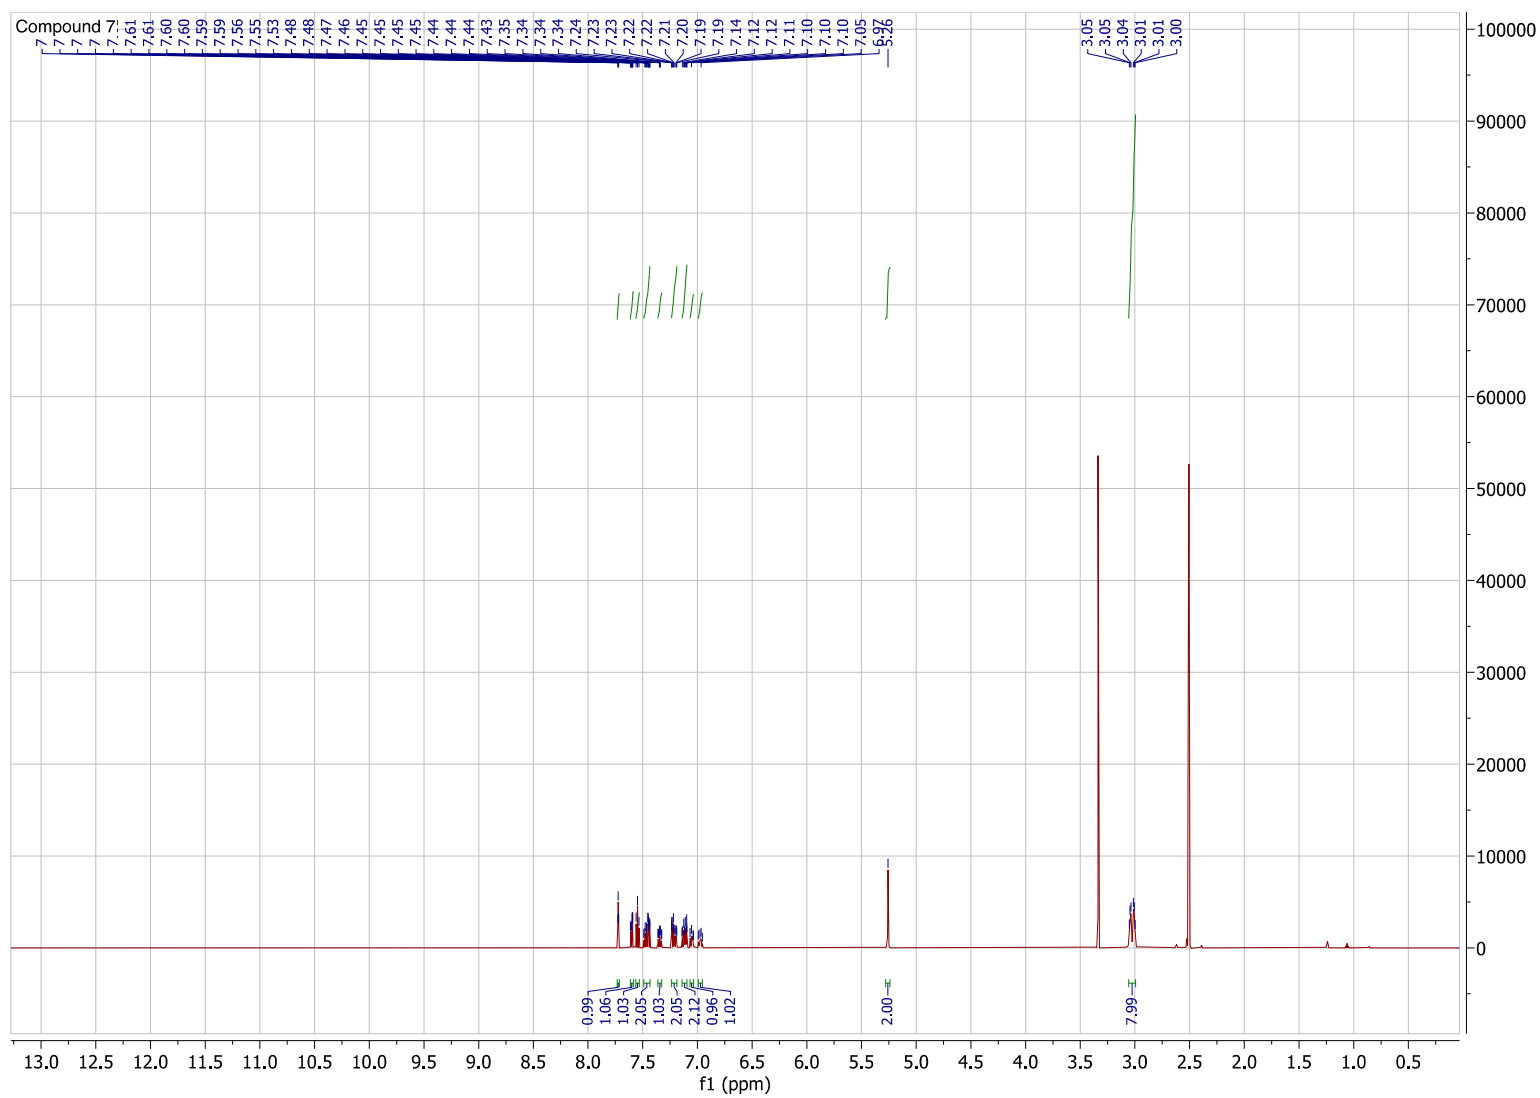

Figure S3. The  $^1\text{H}$  NMR of compound 7.

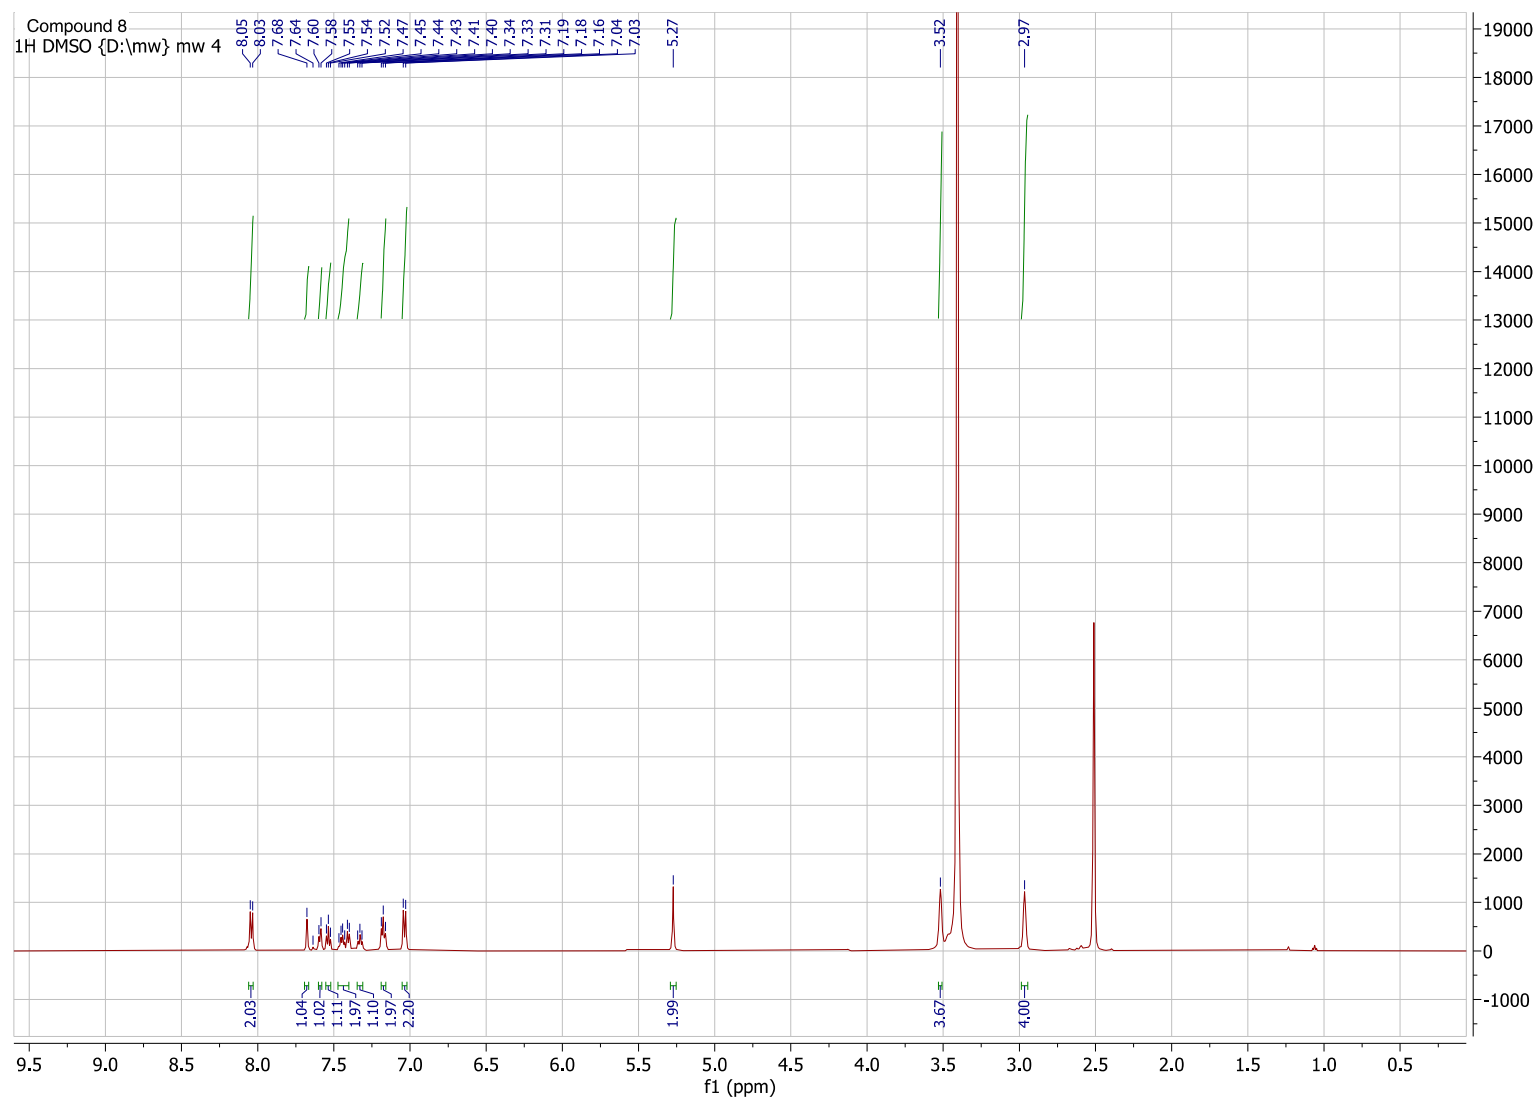

Figure S4. The  $^1\text{H}$  NMR of compound 8.

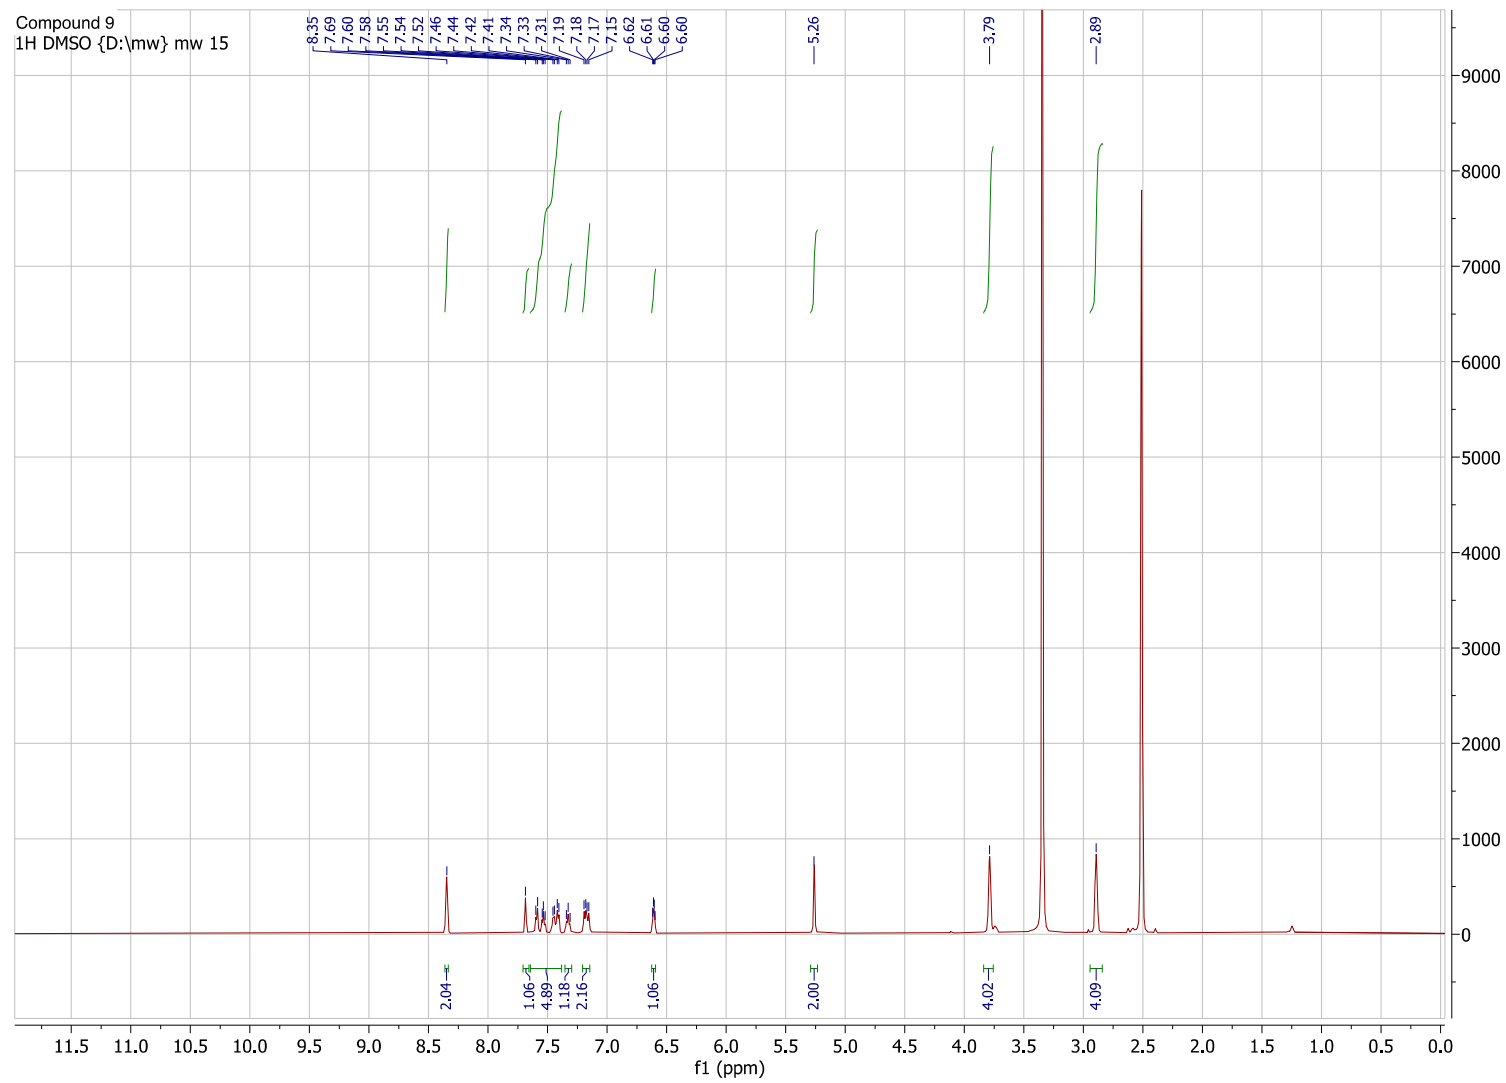

Figure S5. The  $^1\text{H}$  NMR of compound 9.

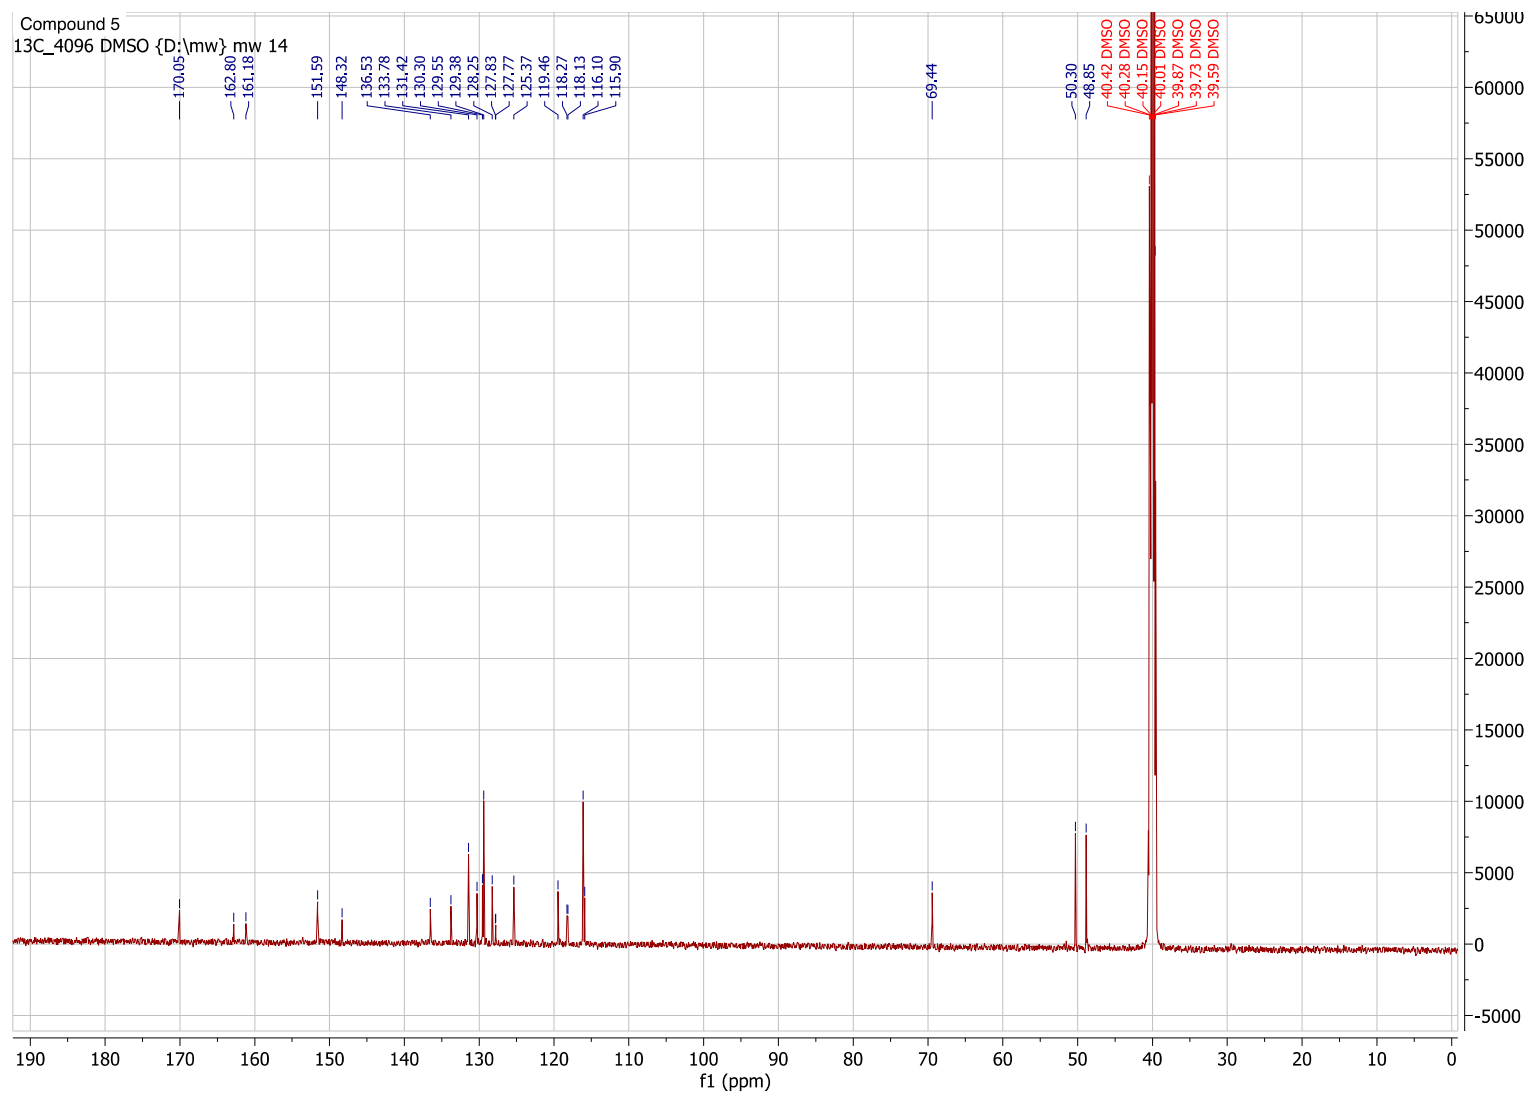

Figure S6. The  $^{13}\text{C}$  NMR of compound 5.

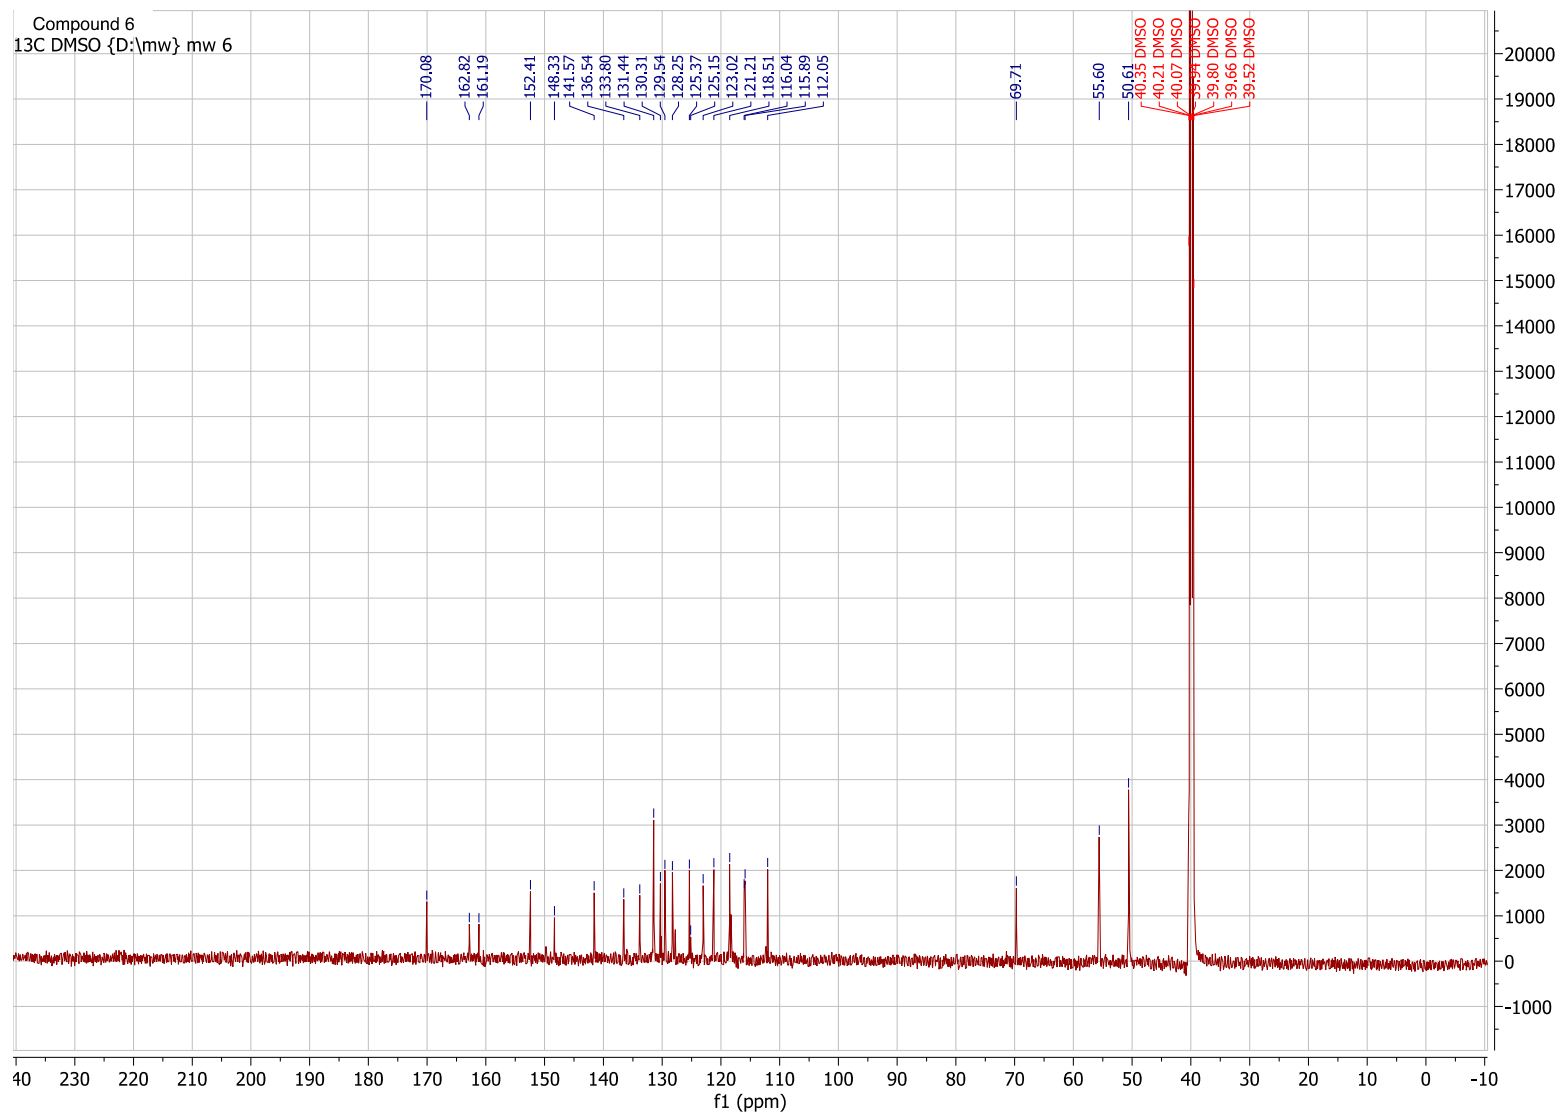

Figure S7. The  $^{13}\text{C}$  NMR of compound 6.



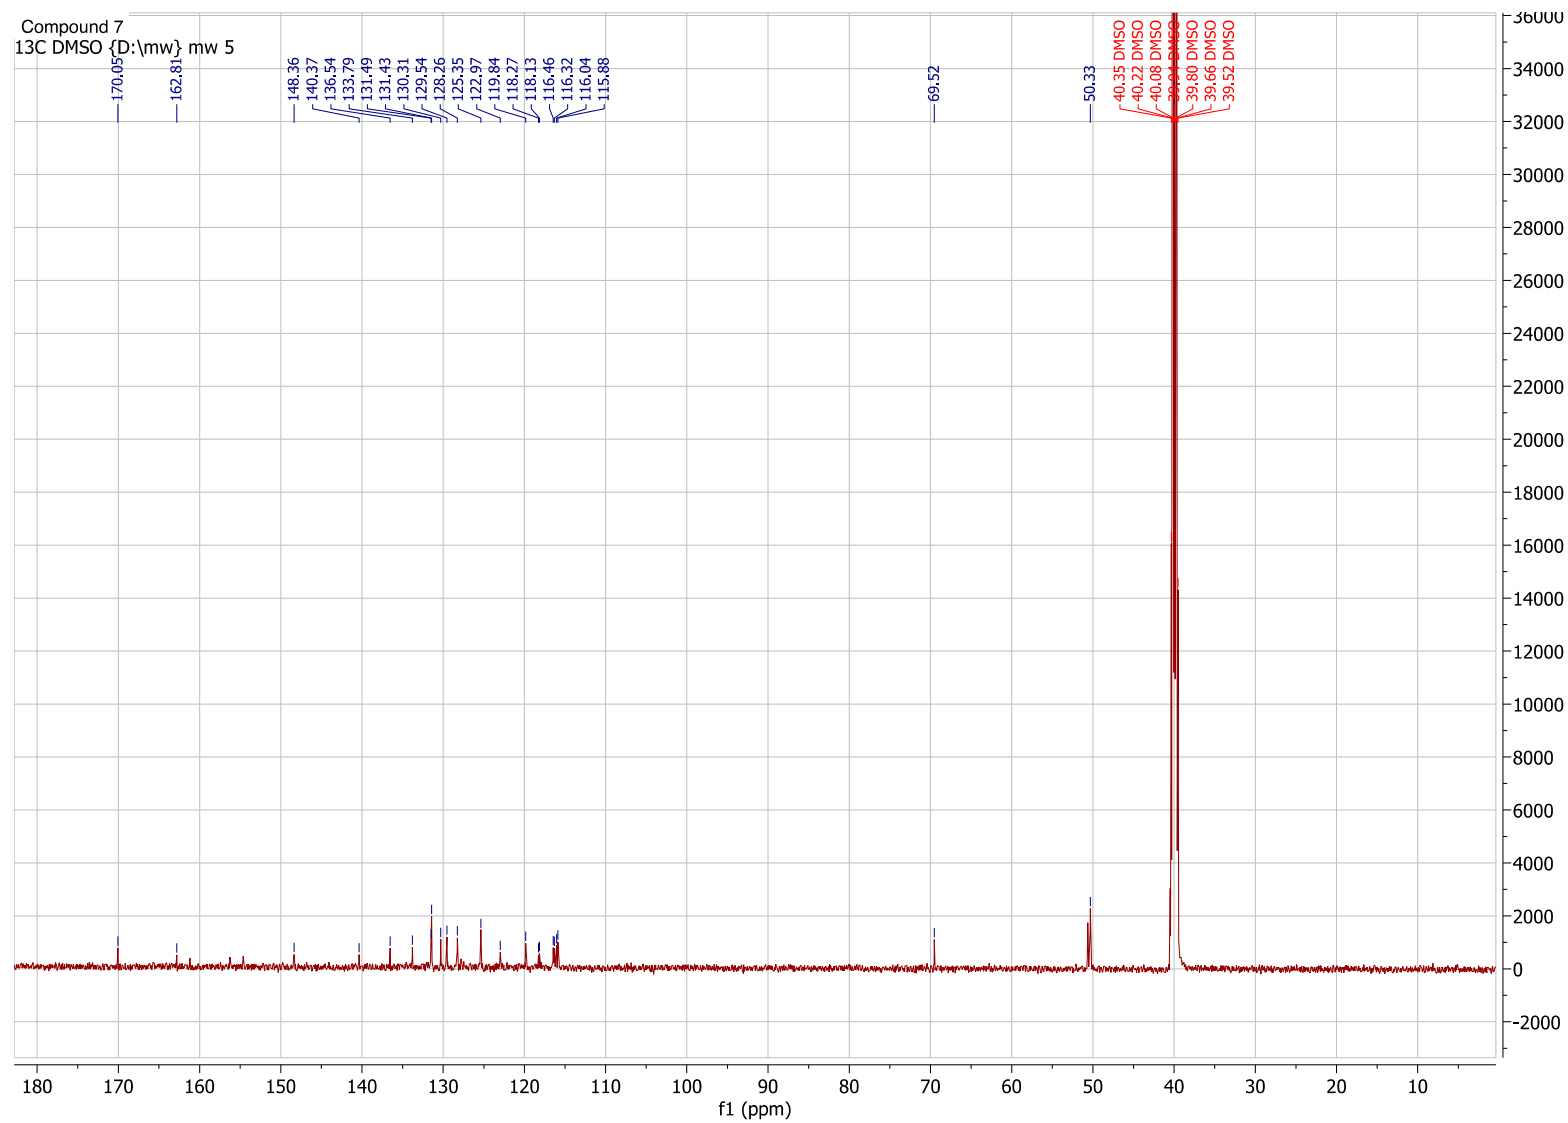

Figure S8. The  $^{13}\text{C}$  NMR of compound 7.

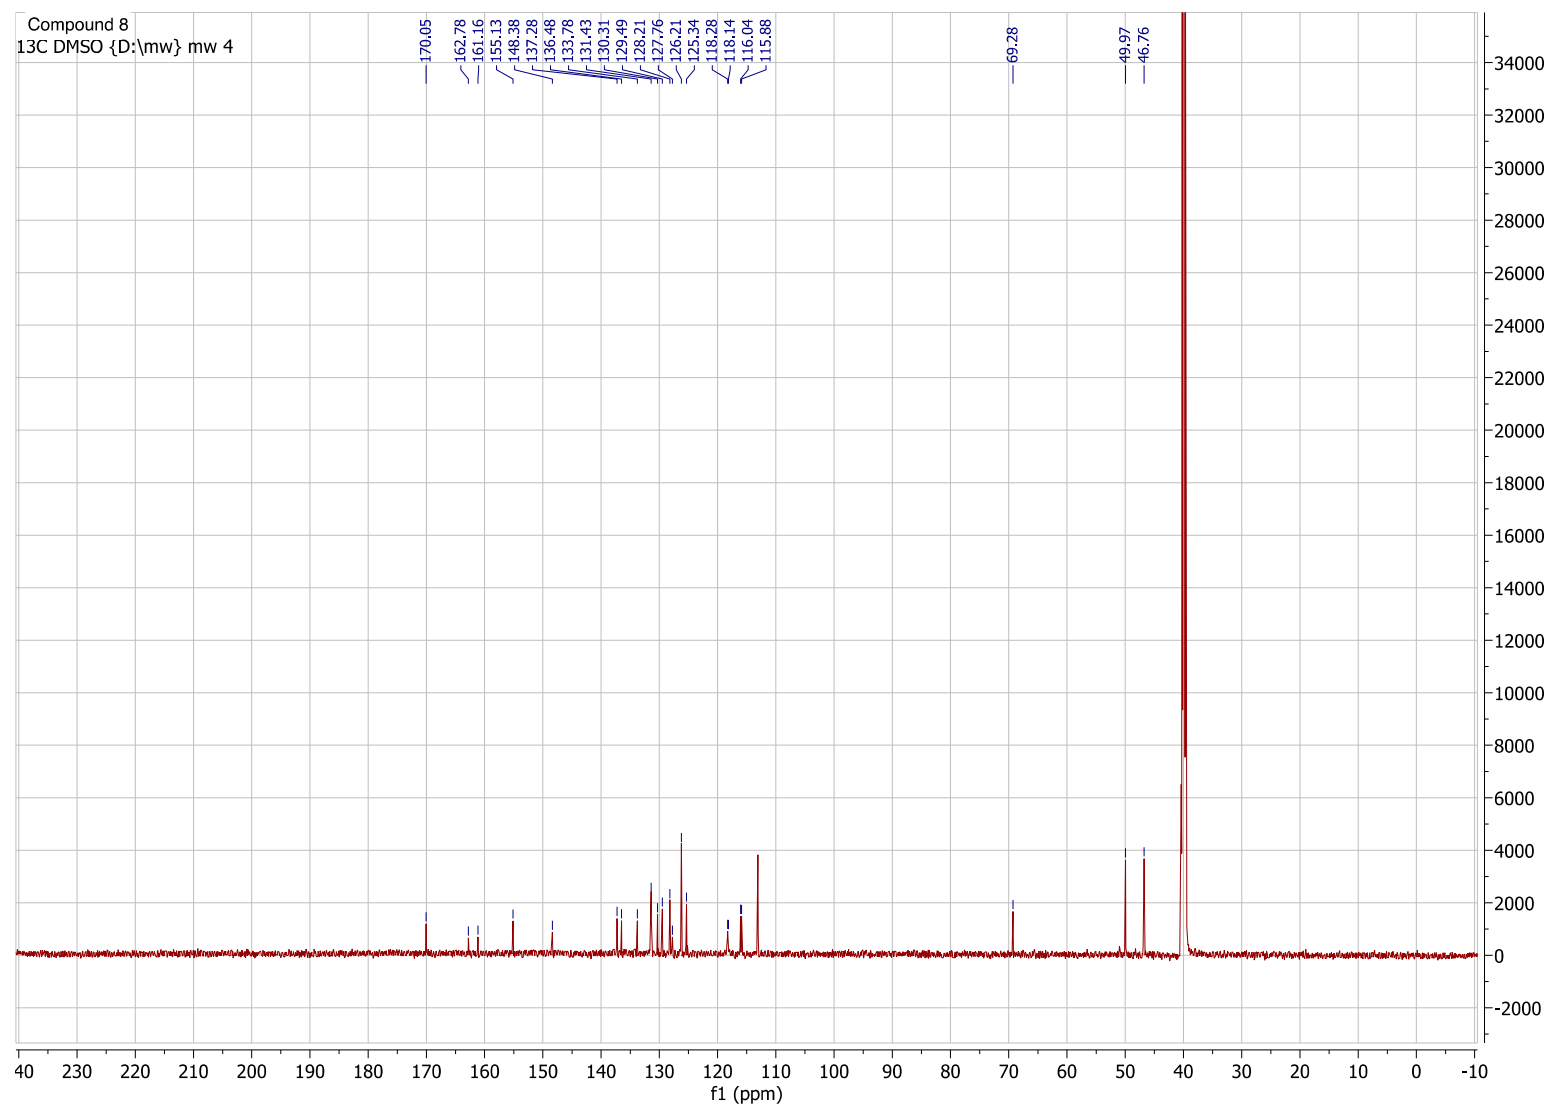

Figure S9. The  $^{13}\text{C}$  NMR of compound 8.

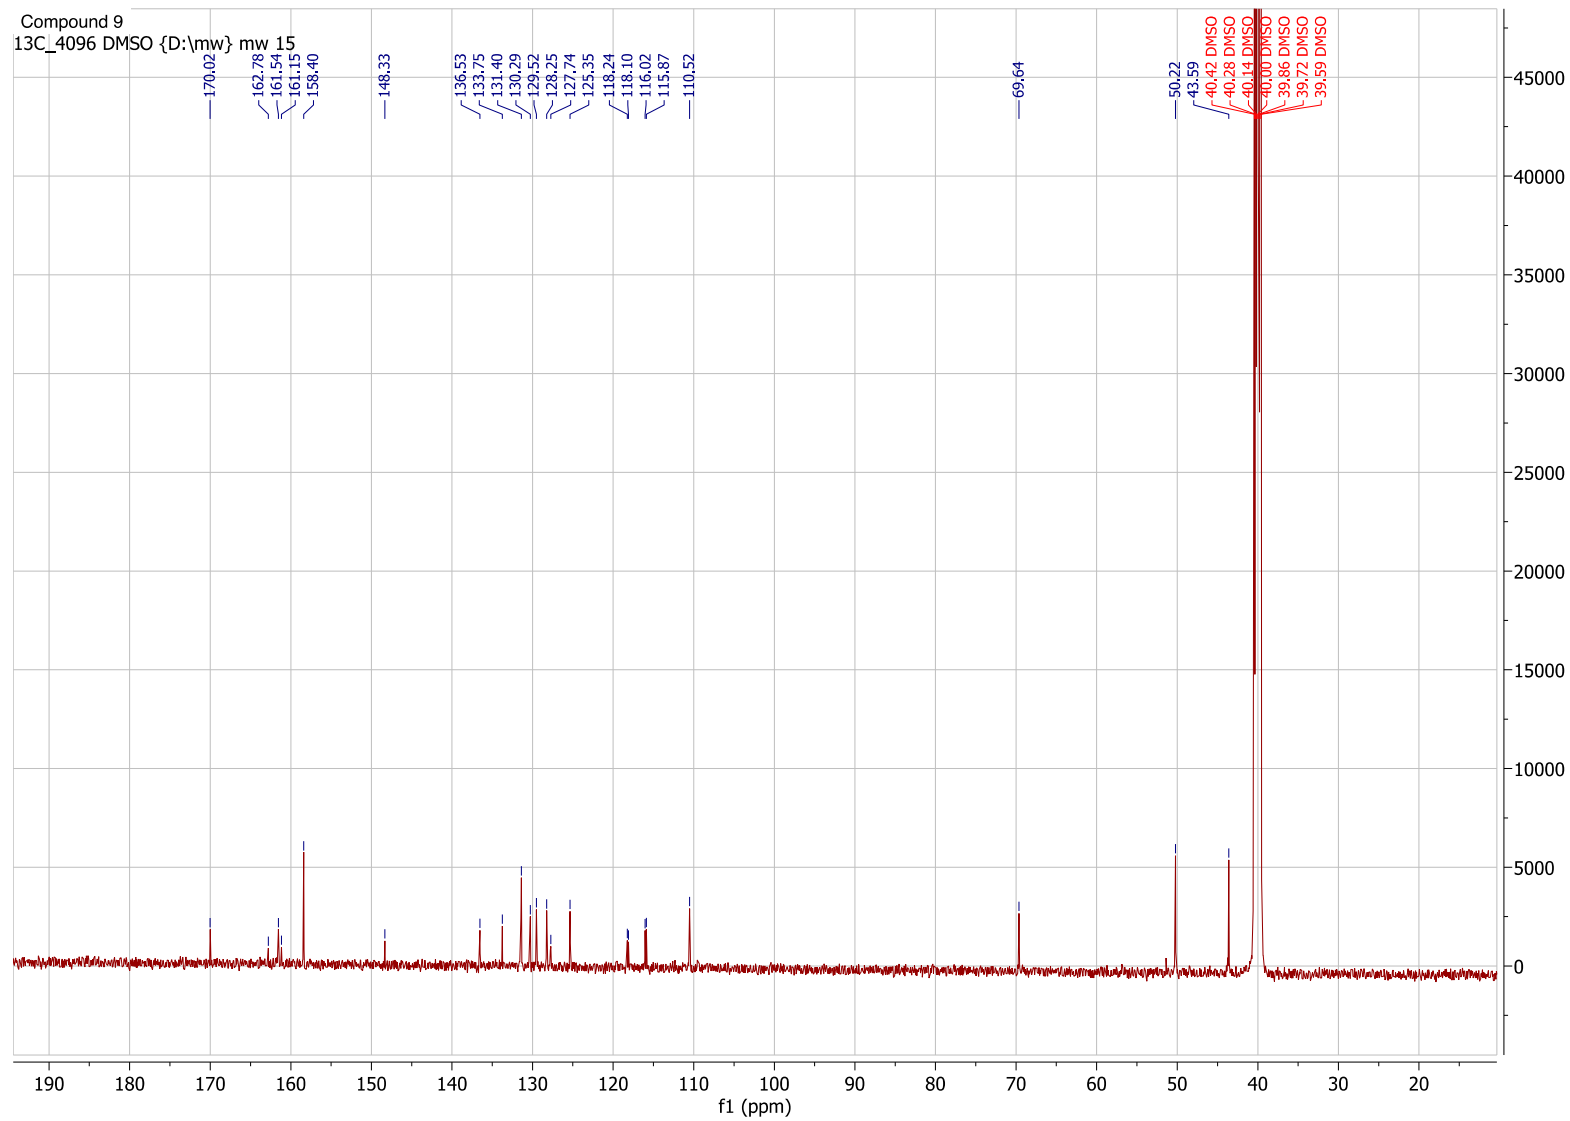

Figure S10. The  $^{13}\text{C}$  NMR of compound 9.
